# 1 NMR metabolomics of symbioses between bacterial vaginosis associated bacteria

2 Victoria Horrocks<sup>1</sup>, Charlotte K. Hind<sup>2</sup>, Matthew E. Wand<sup>2</sup>, Joel Chan<sup>1</sup>, Jade C. Hopkins<sup>1</sup>, Georgina L. Houston<sup>1</sup>,  
3 Rachel M. Tribe<sup>3</sup>, J. Mark Sutton<sup>1,2</sup>, A. James Mason<sup>1\*</sup>

4 <sup>1</sup>Institute of Pharmaceutical Science, School of Cancer & Pharmaceutical Science, King's College London, Franklin-Wilkins  
5 Building, 150 Stamford Street, London, SE1 9NH, United Kingdom

6 <sup>2</sup>Technology Development Group, Research and Evaluation Division, UK Health Security Agency, Porton Down Salisbury, UK

7 <sup>3</sup>Department of Women and Children's Health, School of Life Course Sciences, Faculty of Life Sciences and Medicine, King's  
8 College London,

9 Keywords: bacterial vaginosis, spontaneous preterm birth, vaginal microbiome, *Prevotella bivia*, *Gardnerella vaginalis*, *Pepto-*  
10 *streptococcus anaerobius*, *Atopobium vaginae*, *Mobiluncus curtisii*.

---

11 **ABSTRACT:** Bacterial vaginosis (BV) is a dysbiosis of the vaginal microbiome, characterised by low levels of lacto-  
12 bacilli and overgrowth of a diverse group of bacteria, and associated with higher risk of a variety of infections,  
13 surgical complications, cancer and spontaneous preterm birth (PTB). Despite the lack of a consistently applicable  
14 aetiology, *Prevotella* spp. are often associated with both BV and PTB and *P. bivia* has known symbiotic relationships  
15 with both *Peptostreptococcus anaerobius* and *Gardnerella vaginalis*. Higher risk of PTB can also be predicted by a  
16 composite of metabolites linked to bacterial metabolism but their specific bacterial source remains poorly under-  
17 stood. Here we characterise diversity of metabolic strategies among BV associated bacteria and lactobacilli and  
18 the symbiotic metabolic relationships between *P. bivia* and its partners and show how these influence the availa-  
19 bility of metabolites associated with BV/PTB and/or pro- or anti-inflammatory immune responses. We confirm a  
20 commensal relationship between *Pe. anaerobius* and *P. bivia*, refining its mechanism; *P. bivia* supplies tyrosine,  
21 phenylalanine, methionine, uracil and proline, the last of which leads to a substantial increase in overall acetate  
22 production. In contrast, our data indicate the relationship between *P. bivia* and *G. vaginalis* strains, with sequence  
23 variant G2, is mutualistic with outcome dependent on the metabolic strategy of the *G. vaginalis* strain. Seven *G.*  
24 *vaginalis* strains could be separated according to whether they performed mixed acid fermentation (MAF) or bifid  
25 shunt (BS). In co-culture, *P. bivia* supplies all *G. vaginalis* strains with uracil and received substantial amounts of  
26 asparagine in return. Acetate production, which is lower in BS strains, then matched that of MAF strains while  
27 production of aspartate increased for the latter. Taken together, our data show how knowledge of inter- and intra-  
28 species metabolic diversity and the effects of symbiosis may refine our understanding of the mechanism and ap-  
29 proach to risk prediction in BV and/or PTB.

---

## 30 Introduction

31 Bacterial vaginosis (BV) is regarded as a disruption of the lower genital tract microbiota with a shift from lactoba-  
32 cilli dominance to include a greater proportion of a range of species including members of the genera *Gardnerella*,  
33 *Prevotella*, *Atopobium*, *Mobiluncus*, and *Peptostreptococcus* as well as *Sneathia*, *Leptotrichia*, *Mycoplasma*, and  
34 BV-associated bacterium 1 (BVAB1) to BVAB3.<sup>1</sup> Despite the lack of consistent aetiology documented in women  
35 with BV, vaginal dysbiosis involving a plethora of species, irrespective of whether symptoms of BV are present,  
36 promotes local inflammation and is associated with a wide array of health problems.<sup>1</sup>

37 A specific complication that may be related to BV is a 2-fold increased risk of spontaneous preterm birth (PTB).<sup>2,3</sup>  
38 However, screening for asymptomatic BV in pregnancy in low-risk groups has not aided preterm birth prediction  
39 and evidence is insufficient or conflicting even in studies of higher risk groups. Nevertheless, numerous studies

40 have pursued the association between the vaginal microbiome and PTB risk,<sup>5-16</sup> including our own,<sup>15</sup> and many of  
41 the species identified as associated with higher risk of PTB overlap with those associated with BV.

42 Changes in microbiota composition are reflected in variations in bacterial derived metabolite profiles,<sup>11,15,17</sup> which  
43 may have functional impact.<sup>18-21</sup> Consistent with the microbiome studies, elevated vaginal lactate, which is the  
44 major product of the lactobacilli, and succinate have been found to be associated with term delivery,<sup>11</sup> while  
45 elevated acetate was subsequently found to be higher in women who delivered preterm compared with term.<sup>17</sup>  
46 A role for these metabolites in BV has also been considered,<sup>18,21</sup> with two studies agreeing that low lactate and  
47 high acetate and propionate are characteristic of BV.<sup>22,23</sup> Recently, we have shown that combining microbiome  
48 and metabolome into composite models has predictive value for preterm birth.<sup>15</sup> A composite of metabolites  
49 which include lactate and acetate but also, aspartate, leucine, tyrosine and betaine associated with risk of PTB <  
50 37 weeks while risk of PTB < 34 weeks was identified by a composite comprising *L. crispatus*, *L. acidophilus*, glucose  
51 and, again, aspartate.

52 Although multiple studies have identified *Prevotella* spp. as being associated with both BV, and preterm  
53 birth,<sup>9,12,13,15</sup> their presence has not been found to be predictive of PTB.<sup>15</sup> However, their residence within the  
54 vagina correlates with that of a number of other bacteria including *Gardnerella vaginalis*,<sup>15,16</sup> and *P. bivia* is known  
55 to enjoy symbiotic interactions with both *Peptostreptococcus anaerobius* and *G. vaginalis*.<sup>24-26</sup> Two groups have  
56 found an association between preterm birth and *G. vaginalis*,<sup>7,9,16</sup> but its presence alone does not predict PTB.  
57 There is though, reason to consider whether the substantial diversity of *G. vaginalis* affects the ability to establish  
58 its functional role(s) in both BV and preterm birth.<sup>27</sup> Studies of microbial communities often sequence and quan-  
59 tify specific marker genes and cluster such sequences into Operational Taxonomic Units (OTUs). Although such  
60 OTUs have been generally shown to have high levels of ecological consistency,<sup>28</sup> and the approach remains pop-  
61 ular and useful, there remains the possibility that functionally relevant differences in bacterial behaviour are ob-  
62 scured by this approach. Indeed, in one study that confirmed an association between *G. vaginalis* and preterm  
63 birth, high-resolution statistical bioinformatics was used to detect nine unique *G. vaginalis* 16S rRNA sequence  
64 variants and this revealed that only one of three *G. vaginalis* clades was responsible for the association of the  
65 genus with PTB.<sup>9</sup> Strain level profiling has also helped improve understanding of species co-occurrence profiles.<sup>16</sup>

66 In addition, the role of the otherwise dominant lactobacilli may also be critical in defining PTB risk, with *Lactoba-*  
67 *cillus crispatus* dominance frequently associated with term delivery.<sup>9,10,13,15,16</sup> The picture for *L. iners* is less clear.  
68 One study showed an association with PTB,<sup>10</sup> but two subsequent studies found none.<sup>9,15</sup> Instead they found fre-  
69 quent co-existence of *L. iners* with *G. vaginalis*,<sup>9</sup> which contrasts with *L. crispatus* where an exclusionary relation-  
70 ship with *G. vaginalis* is found,<sup>9,16</sup> or positive correlation with BV associated bacteria including *P. bivia*.<sup>15</sup>

71 Given the valuable utility of the NMR metabolomics approach for identifying risks associated with vaginal dysbio-  
72 sis and predicting PTB, and associations with differing microbiome states likely to have functional impact, there is  
73 an unmet need to understand bacterial contributions to the vaginal metabolome in more detail. To this end, we  
74 aimed to establish a mechanistic basis for a mutualistic symbiotic relationship between *P. bivia* and *G. vaginalis*  
75 and contrast this with the commensal relationship between *P. bivia* and *Pe. anaerobius*. We characterise the di-  
76 verse metabolic strategies of a panel of *G. vaginalis* isolates and determine how this influences symbiosis with *P.*  
77 *bivia*. In addition, we compare metabolism across a panel of lactobacilli to highlight that variation in metabolic  
78 strategy is not limited to BV/sPTB associated bacteria and that the metabolite background will likely vary accord-  
79 ing to microbiome community state type (CST).<sup>5</sup> The information provided by the present study suggests ways of  
80 refining prediction models that include metabolite data and gives insight into how bacterial metabolism and sym-  
81 biosis influence each other, with implications for functional impact and clinical outcomes.

82

## 83 **Experimental procedures**

84 *Isolates.* *Gardnerella vaginalis* 11292, 10915 and 10287, *Peptostreptococcus anaerobius* 11460, *Prevotella bivia*  
85 11156, *Atopobium vaginae* 13935 and *Mobiluncus curtisii* 11656 were obtained from the National Collection of  
86 Type Cultures (NCTC). All other bacteria were isolated from swabs collected from pregnant women recruited with  
87 informed written consent via the INSIGHT study (NHS Human Research Authority, London - City and East Research  
88 Ethics Committee 13LO/1393) or from Salisbury District Hospital (SDH) microbiology lab. Samples from SDH were  
89 received from the microbiology laboratory following diagnostic testing. All identifiers were re-moved by the diag-  
90 nostic laboratory'. The swabs were maintained at ambient temperature during transport in liquid amies buffer and  
91 were used immediately or frozen at -80°C until use. 100 µl of the buffer solution was either plated onto tryptic soy  
92 agar (TSA) and De Man, Rogosa and Sharpe (MRS) agar plates and incubated at 37°C for 48 hours under aerobic  
93 condition or plated onto TSA, MRS agar and Columbia blood agar (CBA), containing 5% defibrinated sheep's blood  
94 (Oxoid), and incubated at 37°C for 48 hours under anaerobic conditions as outlined below. Single colonies were  
95 streaked to purity and identified using MALDI-TOF spectrometry (MALDI Biotyper®, Bruker Daltonics GmbH & Co.  
96 KG, DE).

97 *Bacterial culture.* All *G. vaginalis* isolates, *Pe. anaerobius*, *P. bivia*, *M. curtisii* and *A. vaginae* were plated onto CBA  
98 (Oxoid, Hampshire, UK) containing 5% defibrinated sheep's blood (Oxoid) and incubated at 37°C for 48 hours under  
99 anaerobic conditions generated using Thermo Scientific™ Oxoid™ AnaeroGen™. *L. iners* was plated under the  
100 same conditions for 72 hours. All other *Lactobacillus* species were plated onto MRS agar (Sigma Aldrich) and incu-  
101 bated at 37°C for 48 hours under anaerobic conditions. For initial overnight cultures a 1 µl loop of culture was  
102 used to inoculate 5 ml of brain-heart infusion (BHI) media with 5% horse serum and incubated at 37°C for 48 hours  
103 under anaerobic conditions without shaking. For monoculture samples, 50 µl of overnight culture was added to 5  
104 ml of fresh BHI with 5% horse serum and incubated at 37°C for 48 hours under anaerobic conditions without  
105 shaking. For coculture of *P. bivia* with *G. vaginalis* or *Pe. anaerobius*, from overnight cultures, a 1:1 mix of each  
106 species was used to inoculate 5 ml of fresh BHI with 5% horse serum and incubated at 37°C for 48 hours under  
107 anaerobic conditions without shaking.

108 *MIC testing.* The minimum inhibitory concentrations (MICs) were measured using a broth microdilution method  
109 in polypropylene plates (Greiner). From an overnight culture in BHI 100 µl of bacterial culture totalling an OD<sub>600</sub> of  
110 0.1 was added to 100 µl of BHI media containing antibiotic. After 48 hours of incubation at 37°C under anaerobic  
111 conditions the optical density at a wavelength of 600 nm was read. The lowest concentration of antibiotic where  
112 there was no growth (OD<sub>600</sub> < 0.1) determined the MIC.

113 *NMR metabolomics.* For preparation of samples to be used in metabolomics bacterial cultures were pelleted by  
114 centrifuge at 5000 rpm at 4°C. Supernatant was filtered with 0.22 µm membrane to remove any bacterial cells and  
115 large debris and were stored at -80°C until use. To aid suppression of the water signal and deuterium lock and act  
116 as an internal reference, 60 µl of D<sub>2</sub>O + 3-(trimethylsilyl)propionic-2,2,3,3-d<sub>4</sub> acid sodium salt (TSP-d<sub>4</sub>) was added  
117 to 570 µl of filtered supernatant. The pH of all samples was adjusted using NaOH to within 0.2 pH units of the BHI  
118 media control. <sup>1</sup>H NMR spectra were recorded on Bruker 600 MHz Bruker Avance III NMR spectrometer (Bruker  
119 BioSpin, Coventry, United Kingdom) equipped with a 5 mm <sup>1</sup>H, <sup>13</sup>C, <sup>15</sup>N TCI Prodigy Probe and a cooled sample  
120 changer with all samples kept at 4 °C. The 1D spectra were acquired under automation at a temperature of 298 K  
121 using Carr-Purcell-Meiboom-Gill presaturation (CMPG) pulse sequence (cpmgrp1). The parameters of spectra ac-  
122 quisition are 32 transients, a spectral width of 20.83 ppm and 65,536 datapoints. For assignment of metabolite  
123 peaks additional spectra, Total correlation spectroscopy (TOCSY), <sup>1</sup>H-<sup>13</sup>C heteronuclear single quantum correlation  
124 spectroscopy and J-resolved spectroscopy (JRES), were acquired from a pooled sample containing a small volume  
125 of all samples. Resonance positions are quoted in ppm with respect to the methyl peak of TSP-d<sub>4</sub> at 0.0 ppm.

126 All spectra were Fourier transformed in Bruker software and adjusted using automatic baseline correction and  
 127 phasing in Bruker TopSpin 4.1.3. Multiple databases were used for the assignment of metabolites; Chenomx NMR  
 128 suite software (Chenomx Inc, Canada), Human Metabolome Database (HMDB) and Biological Magnetic Resonance  
 129 Data Bank (BMRB).<sup>29</sup> To convert NMR intensity to mM concentration the Chenomx software programme was used  
 130 calibrated to the concentration of TSP-d4 present in the sample. For multivariate analysis the intensity of all sam-  
 131 ples was normalised using probabilistic quotient normalisation (PQN).<sup>30</sup> For visualisation of data, python packages  
 132 numpy, matplotlib, seaborn, pandas and scipy were used.

133 **Sequencing.** All isolates identified as *G. vaginalis* from MALDI-TOF were also confirmed through whole genome  
 134 sequencing. DNA was extracted from overnight culture in BHI using the GenElute™ Bacterial Genomic DNA Kits  
 135 (Sigma Aldrich). DNA was tagged and multiplexed with the Nextera XT DNA kit (Illumina, San Diego, US) and se-  
 136 quenced by Public Health England Genomic Services and Development Unit, (PHE-GSDU) on an Illumina (HiSeq  
 137 2500) with paired-end read lengths of 150 bp. A minimum 150 Mb of Q30 quality data were obtained for each  
 138 isolate. FastQ files were quality trimmed using Trimmomatic<sup>31</sup>. SPAdes 3.1.1 was used to produce draft chromo-  
 139 somal assemblies, and contigs of less than 1 kb were filtered out<sup>32</sup>. Whole genome alignment and phylogenetic  
 140 tree generation were performed using progressive alignment in Mauve Version 20150226 build 10. Tree visualisa-  
 141 tion was performed in FigTree Version 1.4.3.

## 142 Results

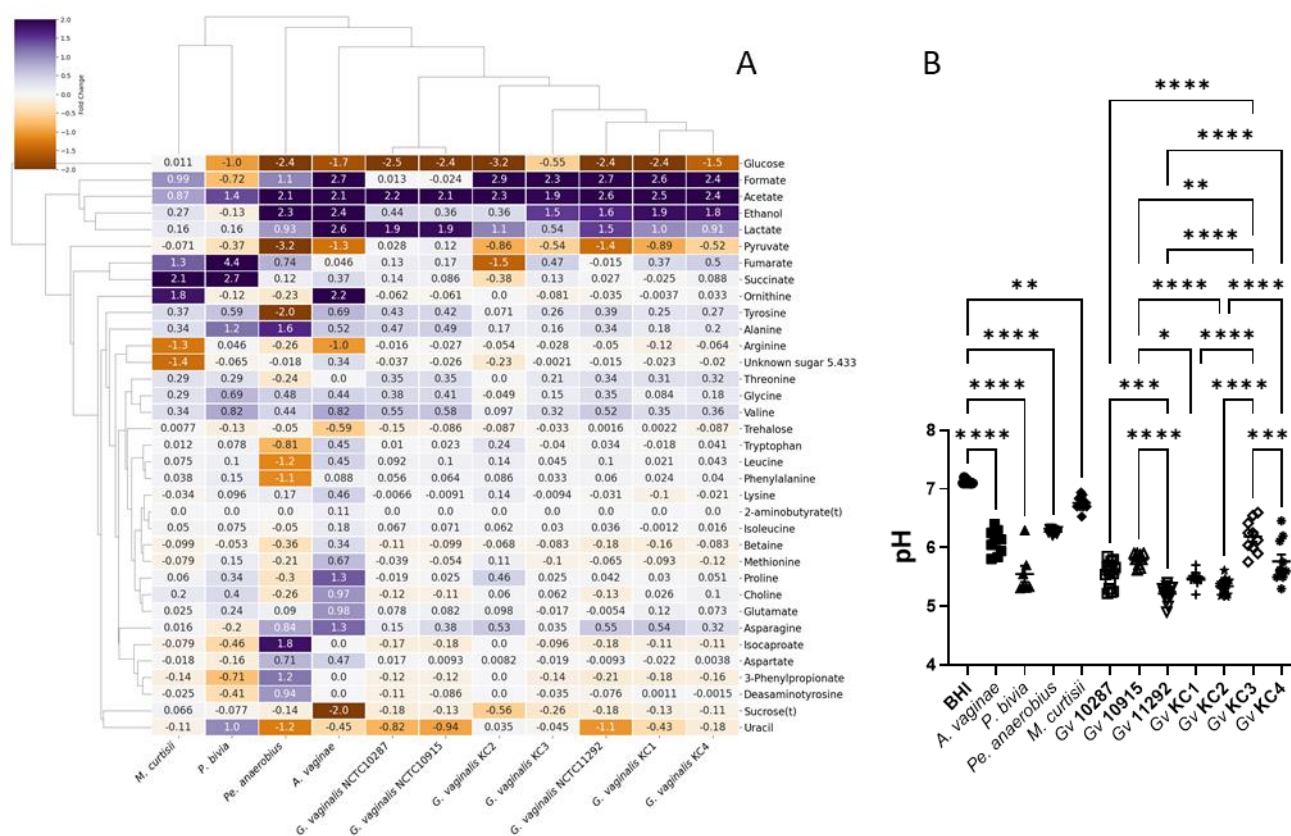

143  
 144 **Figure 1. Diversity of bacterial vaginosis associated bacteria metabolism, when cultured in brain heart infusion.** The  
 145 heatmap (A) compares the metabolite fold change from <sup>1</sup>H NMR of spent culture media and enables the major metabolites  
 146 produced by each isolate and the key differences in metabolic strategy to be revealed. The resulting acidification of the spent  
 147 culture media accordingly varies (B). Comparisons are shown between fresh BHI and the five non-*G. vaginalis* conditions and  
 148 between each of the *G. vaginalis* strains, as determined by One-way ANOVA with Tukey correction for multiple comparisons.  
 149 \*  $p < 0.05$ , \*\*  $p < 0.01$ , \*\*\*  $p < 0.001$ , \*\*\*\*  $p < 0.0001$ . All *G. vaginalis* strains acidify the media ( $p < 0.0001$ ).



150 To better understand the contribution of different bacteria to the vaginal metabolome in eubiosis and dysbiosis a  
151 panel of lactobacilli and BV associated isolates was assembled. Whole genome sequencing of seven *G. vaginalis*  
152 strains included reference strains from the NCTC and new isolates from vaginal swabs, enables them to be assigned  
153 to Clades<sup>9,16,33</sup> or subgroup<sup>34</sup> and identifies genes for sialidase and vaginolysin (Table 1). Though expression was  
154 not tested, all isolates carry the genes coding for sialidase and vaginolysin. Strains KC1 and KC2 have Type 1B  
155 vaginolysin while the remainder have Type 1A.<sup>35</sup> Six of the seven strains are members of Clade 1/Subgroup C/Clade  
156 GV2a, corresponding to sequence variant G2 strains which have been shown to drive observed associations with  
157 PTB.<sup>9</sup> The remaining isolate, KC1, is a member of Clade 3/Subgroup D/Clade GV1b. Tested for susceptibility to the  
158 main antibiotics used for BV, two isolates, KC1 and KC3, are found to be resistant to metronidazole and tinidazole.  
159 All isolates are sensitive to clindamycin and erythromycin.

160 *Overview of bacterial metabolism in BHI and identification of major metabolic strategies for BV associated bacte-*  
161 *ria.* Analysis of BHI spent culture allows comparison of the overall metabolic strategy for each of the BV associated  
162 bacteria but also comparison (Fig. 1) of the relative amounts of key metabolites that define the vaginal chemical  
163 environment and/or have been associated with BV and/or PTB (Fig. 2; S1). The NMR metabolomic approach clearly  
164 identifies the pyruvate and/or glucose fermentative strategies of *A. vaginae*, *Pe. anaerobius* and the seven *G.*  
165 *vaginalis* isolates. The seven *G. vaginalis* isolates can be distinguished from each other and classified according to  
166 whether they use the bifid shunt (BS) alone, producing lactate and acetate from glucose,<sup>36</sup> or mixed acid fermenta-  
167 tion (MAF) producing lactate and acetate but also formate and ethanol and consuming pyruvate in addition to  
168 glucose (Fig. 1A; 2A/B/E/F). *G. vaginalis* 10287 and 10915 are hence classified as using BS alone while the remain-  
169 der all use MAF.

170 *M. curtisii* is known to be capable of using trimethylamine oxide (TMAO) as an electron donor for anaerobic res-  
171 piration, producing trimethylamine (TMA).<sup>37</sup> In BHI it also conducts anaerobic respiration, but the production of  
172 succinate (Fig. 1; 2C) is suggestive of fumarate acting as the electron donor in place of TMAO which is absent. *M.*  
173 *curtisii* is known also to consume arginine to produce ornithine, citrulline and ammonia,<sup>38</sup> and both it and *A. va-*  
174 *ginae* do this also in BHI (Fig. 1A; S1E/T). *P. bivia* characteristically also produces succinate via anaerobic respiration  
175 but also ferments glucose to acetate,<sup>39</sup> and this is observed in BHI alongside avid consumption of asparagine (Fig.  
176 1A; 2B/C; S1D). *P. bivia* notably excretes a variety of metabolites that are not produced at the same levels or at all,  
177 and are often consumed, by the other BV associated bacteria. These include succinate and fumarate and alanine,  
178 glutamate, glycine, methionine, phenylalanine, proline, valine and uracil (Fig. 1A; S1C/H/J/L/M/N/O/P/R/S).

179 The result of these differing metabolic strategies is, in every case, an acidification of the spent BHI culture but this  
180 is relatively modest for *M. curtisii*, *Pe. anaerobius* and *A. vaginae* compared with that observed for the seven *G.*  
181 *vaginalis* strains and *P. bivia* (Fig. 1B).

182 Considering the lactobacilli, four species are considered obligate homofermentative (*L. acidophilus*, *L. crispatus*,  
183 *L. gasseri* and *L. iners*) using the Embden-Meyerhof-Parnas (EMP) pathway to make lactate (both D-lactate and L-  
184 lactate with the exception of *L. iners* that makes only L-lactate), two species are considered facultative heterofer-  
185 mentative making lactate (L-lactate for *L. rhamnosus* and D-lactate for *L. jensenii*) and acetate and one species, *L.*  
186 *fermentum*, is obligate heterofermentative producing lactate, acetate and ethanol as well as CO<sub>2</sub>.<sup>40</sup> The present  
187 NMR results are consistent with this with all lactobacilli producing lactate (Fig. S2A; S3A), only *L. fermentum* pro-  
188 ducing substantial quantities of ethanol (Fig. S2A; S3E) and only *L. rhamnosus* producing substantial amounts of  
189 formate (Fig. S2A; S3F). Consistent with genome sequence studies, which showed a lack of enzymes to produce  
190 acetate,<sup>41,42</sup> *L. iners*, is the only *Lactobacillus* in this study that does not produce any acetate in BHI; acetate pro-  
191 duction by the other lactobacilli varies considerably (Fig. S2A; S3B). The lactobacilli can be further distinguished,  
192 notably at strain level for *L. crispatus*, by differing consumption of pyruvate, asparagine, arginine, glycine, lysine  
193 and proline (Fig. S4B/D/J/K/M/P/R) and production of alanine, valine, isoleucine and uracil (Fig. S4K/S/T/U).

194 Acidification of the spent culture media is likely limited by the relatively low glucose concentration in BHI but the  
 195 greatest acidification is achieved by *L. acidophilus* (significantly more than all except *L. crispatus* 2), which also  
 196 produces more lactate than any of the other strains ( $p < 0.05$ ) (Fig. S2B; S3A).

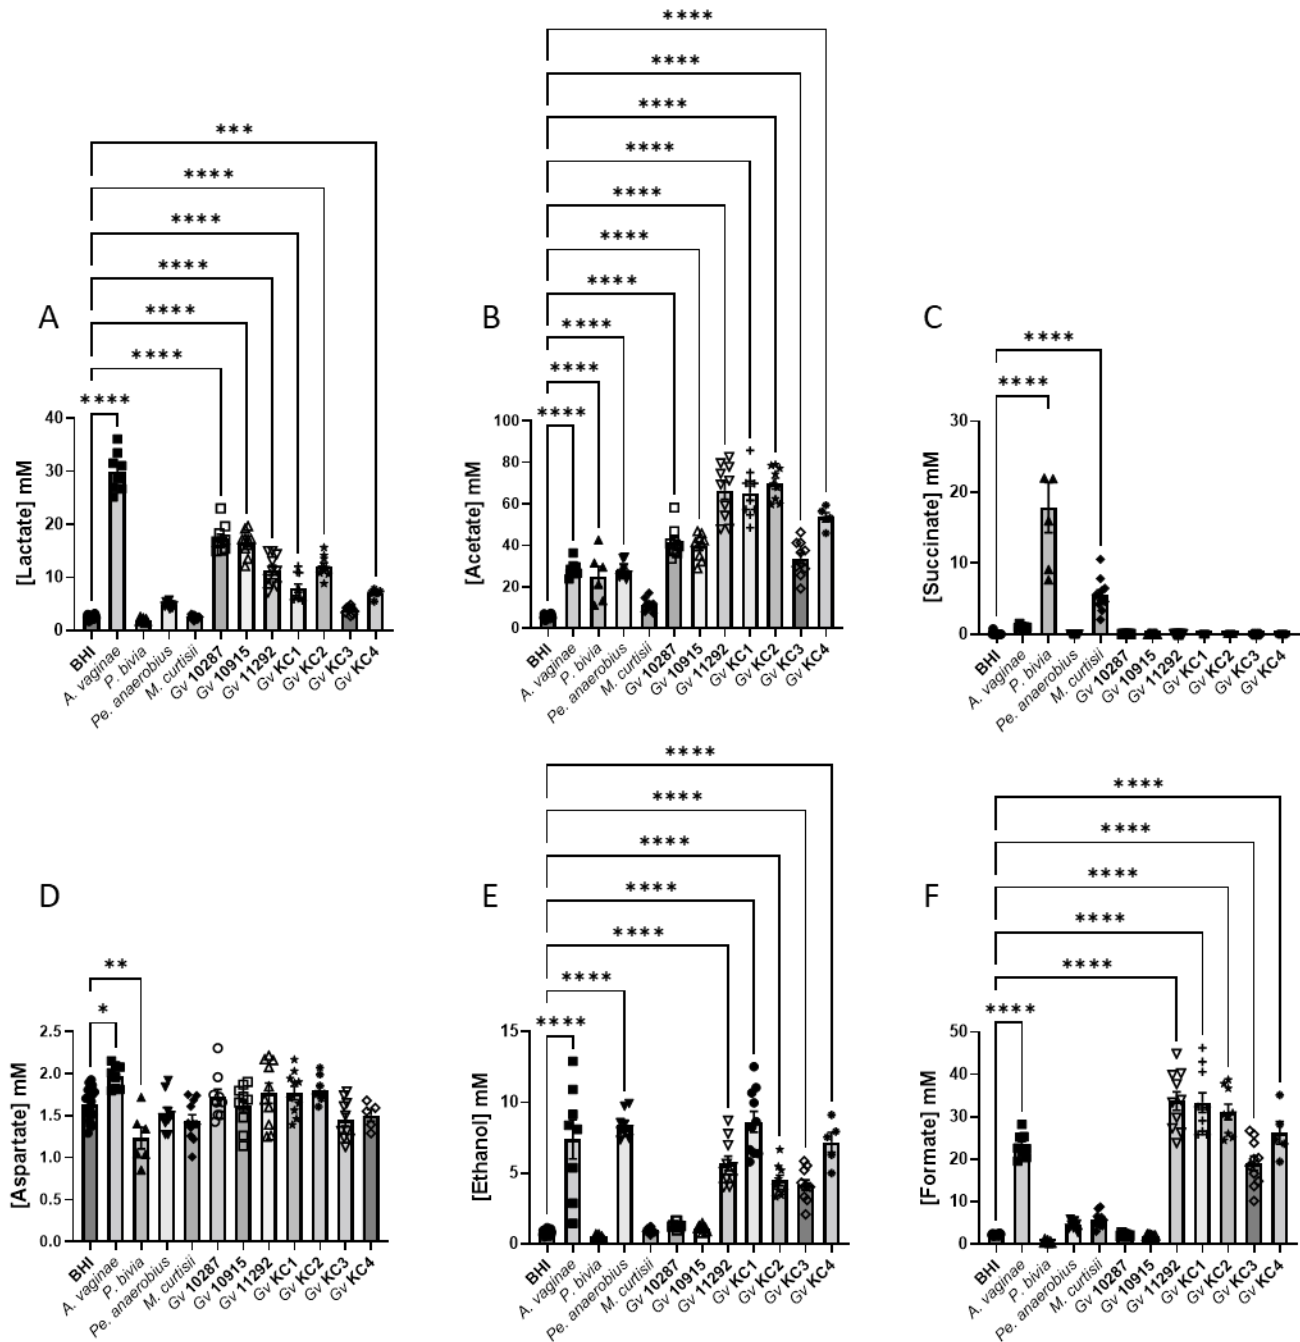

197

198 **Figure 2. Production of organic acids, aspartate and ethanol by bacterial vaginosis associated bacteria in BHI.** Comparisons  
 199 are made between BHI and each spent culture as determined by One-way ANOVA with Tukey correction for multiple compar-  
 200 isons for the main products of fermentation and/or those involved in anaerobic respiration. Comparisons for other metabo-  
 201 lites presented in Fig. S1. Only pairwise comparisons where  $p < 0.05$  are shown. \*  $p < 0.05$ ; \*\*  $p < 0.01$ ; \*\*\*  $p < 0.001$ ; \*\*\*\*  $p$   
 202  $< 0.0001$ .

203 We have shown previously that lower lactate and higher acetate were associated with increased risk of PTB < 37  
 204 weeks (odds ratios respectively 0.432 and 1.610).<sup>15</sup> As expected, and again despite the relatively low concentration  
 205 of glucose in BHI, the lactobacilli produce a final lactate concentration of between 30 and 45 mM in spent BHI

206 culture (Fig. S3A), which substantially exceed production by BV associated bacteria (Fig. 2A). Of note however is  
207 that *A. vaginae* spent culture is enriched with around 27 mM lactate and the two BS *G. vaginalis* produce substan-  
208 tially more lactate than the five MAF *G. vaginalis* strains ( $p < 0.0001$ ) (Fig. 2A). Except for *L. iners*, acetate is pro-  
209 duced by lactobacilli in BHI to achieve final concentrations ranging from 5 mM to 21 mM (Fig. S3). Similar levels of  
210 acetate production are achieved by *A. vaginae*, *P. bivia* and *Pe. anaerobius* but this is dwarfed by production by *G.*  
211 *vaginalis* with BS strains attaining c 35 mM and MAF strains as much as 65 mM. Although succinate secretion is a  
212 hallmark of anaerobic respiration and concentrations of nearly 18 mM are achieved in *P. bivia* spent culture (Fig.  
213 2C), small amounts of this dicarboxylate (1-4 mM) are also detected in all lactobacilli spent cultures with the ex-  
214 ception again of *L. iners* (Fig. S3C).

215 Higher aspartate has previously been associated with increased risk of PTB < 37 and < 34 weeks (odds ratios re-  
216 spectively 1.675 and 1.768).<sup>15</sup> Seven of the nine lactobacilli strains produce this, but this is very modest with spent  
217 culture enriched by a maximum of 1.2 mM aspartate (Fig. S3D). In monoculture, none of the *G. vaginalis* strains  
218 produce aspartate but modest amounts are produced by *A. vaginae* and it is consumed by *P. bivia* (Fig. 2D). We  
219 have reported higher glucose associated with increased risk of PTB < 34 weeks (odds ratio 1.269).<sup>15</sup> Almost all  
220 glucose in BHI is consumed by both lactobacilli and BV associated bacteria, with the exception of *M. curtisii* (Fig.  
221 S1A/S4A). *G. vaginalis* KC3 did not consume all glucose in this first study but subsequently it grew well, and its  
222 consumption matched that of the other *G. vaginalis* strains (Fig. S1A/S7A). In contrast, pyruvate available in BHI is  
223 not universally consumed (Fig. S1B; S4B). *A. vaginae*, *Pe. anaerobius*, *L. crispatus* 1 and *L. fermentum* consume all  
224 pyruvate available while the remaining lactobacilli and BV associated bacteria, except for *G. vaginalis* 10287 and  
225 10915, consume some but not all. *G. vaginalis* 10287 and 10915 secrete modest amounts of pyruvate into the  
226 spent culture ( $p < 0.05$ ).

227 Higher leucine and betaine and lower tyrosine have also been associated with increased risk of PTB < 37 weeks  
228 (odds ratios respectively, 3.118, 1.365 and 0.023).<sup>15</sup> None of the lactobacilli or BV associated bacteria in the pre-  
229 sent study produce leucine when cultured in BHI though it is avidly consumed by *P. bivia* (Fig. S1G; S4G). Tyrosine  
230 is produced in modest amounts by six of the lactobacilli isolates, most notably by *L. acidophilus*, *L. gasseri* 1 and  
231 2, and most *G. vaginalis* strains as well as *A. vaginae*, *P. bivia* and *M. curtisii* (Fig S1C). It is consumed avidly by *Pe.*  
232 *anaerobius* (Fig. S1C). With the exception of *Pe. anaerobius*, *L. crispatus* 1 and *L. iners*, where there is modest  
233 consumption, the concentration of betaine does not change in the spent culture of either the lactobacilli or the  
234 BV associated bacteria (Fig. S1E; S4H). Similarly, with the exception of *A. vaginae*, changes in choline concentra-  
235 tions are minimal (Fig S1F; S4F).

236 *Symbiosis between P. bivia and Pe. anaerobius influences production of key PTB markers.* <sup>1</sup>H NMR of the spent  
237 culture from *P. bivia*, *Pe. anaerobius* and a 1:1 co-culture reveals that combining the two species leads to a sub-  
238 stantial adjustment in the levels of metabolites that have previously been associated with PTB and/or shown utility  
239 in predicting patient outcomes. In the spent BHI media, even though relative abundance could not be enumerated  
240 by plating, there is clear evidence from production and consumption of species-specific metabolites that both  
241 species proliferate (Fig. 3). In monoculture, only *P. bivia* consumes asparagine and produces butyrate, fumarate  
242 and succinate and this is observed also in co-culture although succinate production is reduced ( $p < 0.0001$ ) (Fig.  
243 S5A-D). Similarly, *Pe. anaerobius* is known to have a characteristic organic acid production profile,<sup>43</sup> and in mono-  
244 culture, of the two species, only *Pe. anaerobius* consumes phenylalanine, proline, tyrosine, uracil, lysine, methio-  
245 nine, choline and leucine (Fig. S5J-Q) and produces ethanol, 4-methylpentanoate (isocaproate), 3-(4-hydroxy-  
246 phenyl)propanoate (desaminotyrosine/phloretic acid), 3-phenylpropionate (hydrocinnamate) and 5-aminopenta-  
247 noate (aminovalerate) (Fig. S5E-I). With the possible exception of choline consumption, this is also observed in co-  
248 culture, with increased production observed for all five of its specific products.

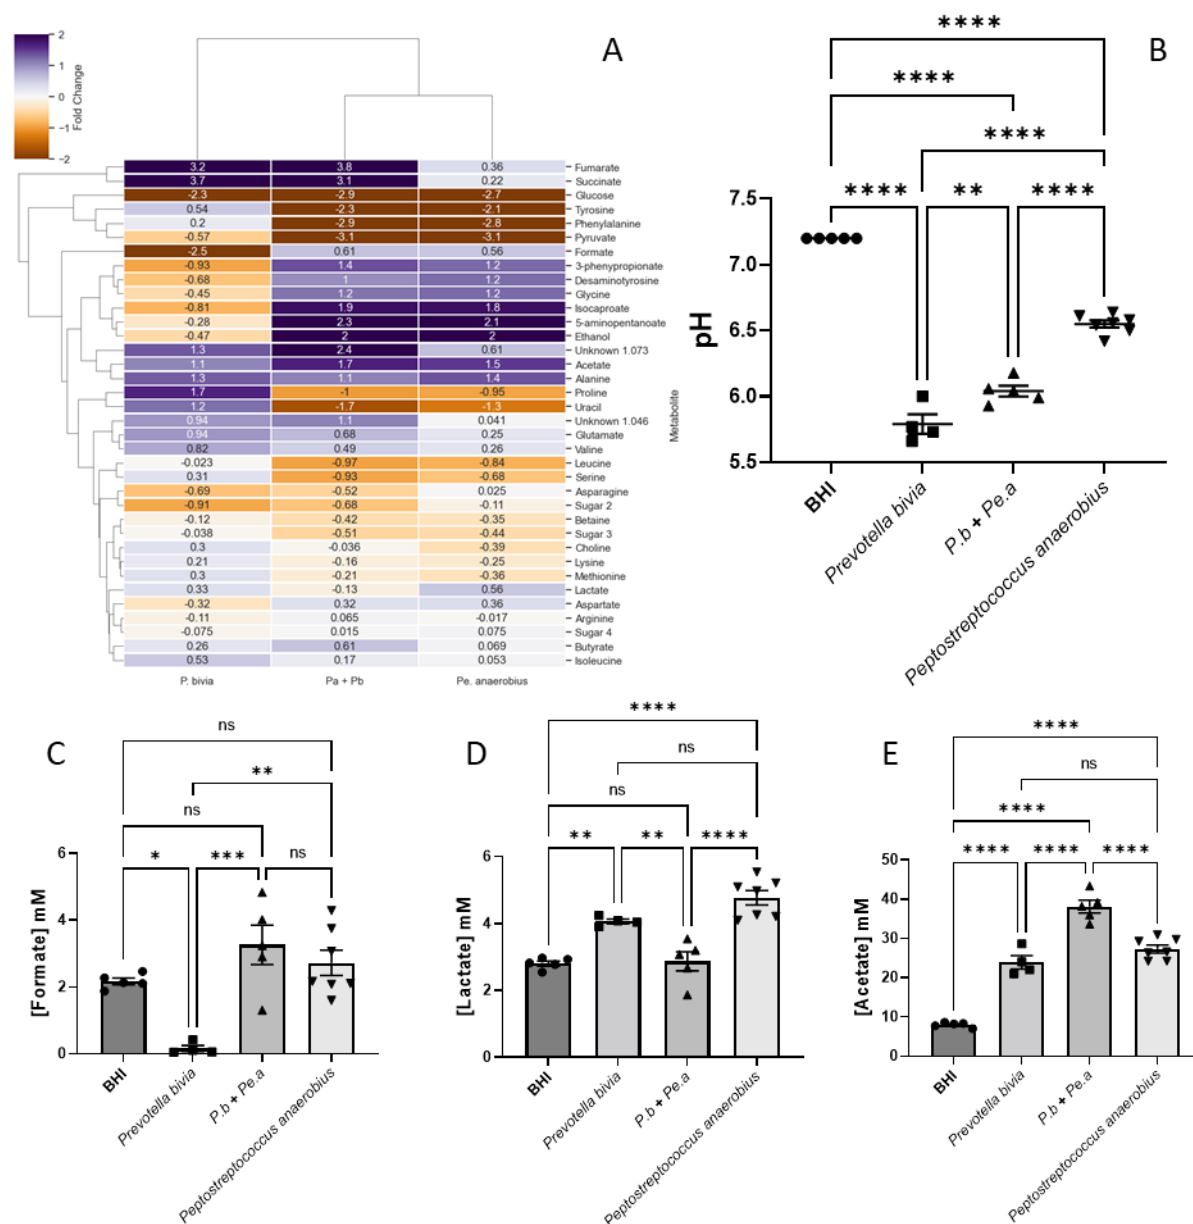

249

250 **Figure 3. Commensal symbiosis of *P. bivia* and *Pe. anaerobius* in BHI generates a distinct chemical environment.** The  
 251 heatmap compares the metabolite fold change from  $^1\text{H}$  NMR of spent culture media and enables, the major metabolites  
 252 produced by each isolate and the key differences in metabolic strategy to be revealed (A). The pH of the three spent cultures  
 253 is compared with fresh BHI (B). Levels of formate (C), lactate (D) and acetate (E) in spent culture are shown relative to fresh  
 254 BHI. Further metabolites are shown in Fig. S5 and S6. Comparisons are shown between all conditions, as determined by One-  
 255 way ANOVA with Tukey correction for multiple comparisons. \*  $p < 0.05$ , \*\*  $p < 0.01$ , \*\*\*  $p < 0.001$ , \*\*\*\*  $p < 0.0001$ .

256 Previously, a commensal symbiosis between *P. bivia* and *Pe. anaerobius* has been demonstrated and ascribed to  
 257 use of amino acids, by *Pe. anaerobius*, that were secreted by *P. bivia*.<sup>24</sup> Here,  $^1\text{H}$  NMR identifies enrichment of BHI  
 258 media with tyrosine, phenylalanine, proline, methionine, alanine, glutamate, glycine, isoleucine, valine and also  
 259 choline and uracil (Fig. S5/S6). Of these, *Pe. anaerobius* avidly consumes tyrosine, phenylalanine, proline and ura-  
 260 cil, and modestly consumes methionine and possibly choline (Fig. S5). Levels of alanine, glutamate, glycine, iso-  
 261 leucine and valine are also lower in the co-culture spent media than that of *P. bivia* but, since these are available  
 262 in BHI normally and are not consumed in *Pe. anaerobius* monoculture, it is assumed that this reduction can also  
 263 be accounted for by a lower overall growth of *P. bivia* in the combination relative to monoculture (Fig. S6).



264 While the benefits of co-culture to *Pe. anaerobius* appear manifold, the reverse is not true for *P. bivia* and <sup>1</sup>H NMR  
265 does not detect any metabolites produced by *Pe. anaerobius* that are consumed by *P. bivia*. This supports the  
266 previous finding of a commensal relationship between the two organisms.<sup>24</sup> There is one possible caveat to this in  
267 that, while no effect of *Pe. anaerobius* conditioned media on *P. bivia* growth was observed previously,<sup>24</sup> here we  
268 find that *P. bivia* metabolism is likely altered by co-culture with *Pe. anaerobius*. First, while production of *Pe. an-*  
269 *aerobius* specific metabolites is increased in co-culture relative to monoculture, the same is true for *P. bivia* only  
270 for butyrate ( $p = 0.0295$ ), with less succinate, alanine, glutamate, glycine and valine than might be expected. Sec-  
271 ond, the total consumption of formate by *P. bivia* in monoculture is not observed in co-culture (Fig. 3C) while  
272 lactate, produced by both species in monoculture, is no more abundant in the co-culture spent media than in  
273 fresh BHI (Fig. 3D) even though acetate production almost doubles (Fig. 3E). Both formate and lactate are potential  
274 electron donors for anaerobic respiration and the NMR analysis provides evidence for a switch in electron donor,  
275 from formate to lactate, by *P. bivia* when *Pe. anaerobius* is present.

276 The spent culture media pH will be affected by the production/consumption of a range of organic and amino acids.  
277 Although acidification of spent culture will be limited due to the relatively low levels of glucose interactions be-  
278 tween these two species will affect the acidity of the environment (Fig. 3B). Despite production of acetate (pKa  
279 4.76) and lactate (pKa 3.86), acidification by *Pe. anaerobius* is relatively modest with a reduction by only 0.65 pH  
280 units. In contrast, both the spent *P. bivia* monoculture and co-culture are reduced by over one pH unit (respectively  
281 1.41 and 1.16). In both cases substantial amounts of succinate (pKa 4.2, 5.6) are produced (20 mM vs 9.5 mM for  
282 monoculture vs co-culture). More acetate is produced in the co-culture (30.1 vs 15.9 mM) but there is no net  
283 lactate production. These effects combine to ensure that the spent co-culture pH is a little higher than that of the  
284 *P. bivia* monoculture but substantially lower than that corresponding to *Pe. anaerobius*.

285 *Symbiosis between P. bivia and G. vaginalis is strain and metabolic strategy dependent* – Five *G. vaginalis* strains  
286 (10287, 10915, 11292, KC1 and KC3), representing both BS and MAF strategies, were selected for co-culture ex-  
287 periments with *P. bivia* NCTC 11156. With the exception of KC1, the only strain in the present study not of sequence  
288 variant G2,<sup>9</sup> positive correlations were detected between the number of CFU identified for either species when  
289 plated following co-culture in BHI (Fig. 4B, Table 2), with the strongest positive relationship found for *G. vaginalis*  
290 10287, one of the BS strains.

291 The Spearman and Pearson  $r$  for KC1 are both negative indicating that when *G. vaginalis* KC1 grew well, *P. bivia*  
292 did not, and vice versa. This is manifested in the metabolomics analysis where levels of some metabolites, known  
293 to be produced by *P. bivia*, notably succinate, fumarate, proline, uracil and alanine are highly variable (Fig. S7D-F,  
294 J, K). There is some explanation for this phenomenon in the metabolomics data (Fig.4A). Notably, KC1 may be the  
295 only one of the five *G. vaginalis* strains that is not capable of adequately supplying asparagine to *P. bivia* (Fig. 4D).  
296 As noted above, *P. bivia* avidly consumes asparagine since this can be used to produce aspartate and, in turn,  
297 fumarate which is an important electron acceptor anaerobic respiration. Asparagine is produced in substantial  
298 amounts by all *G. vaginalis* isolates ( $p < 0.0001$ ), with the exception of KC1 ( $p = 0.0333$ ). The two BS strains increase  
299 the availability of asparagine by 42% (10915) and 45% (10287). This is modest when compared with MAF strains  
300 11292 and KC3 which respectively increase the availability of asparagine by 63% and 70%, such that approximately  
301 double the amount of asparagine that is consumed by *P. bivia* in monoculture is available in co-culture. In contrast,  
302 KC1 only increases the amount available by 18.5%.

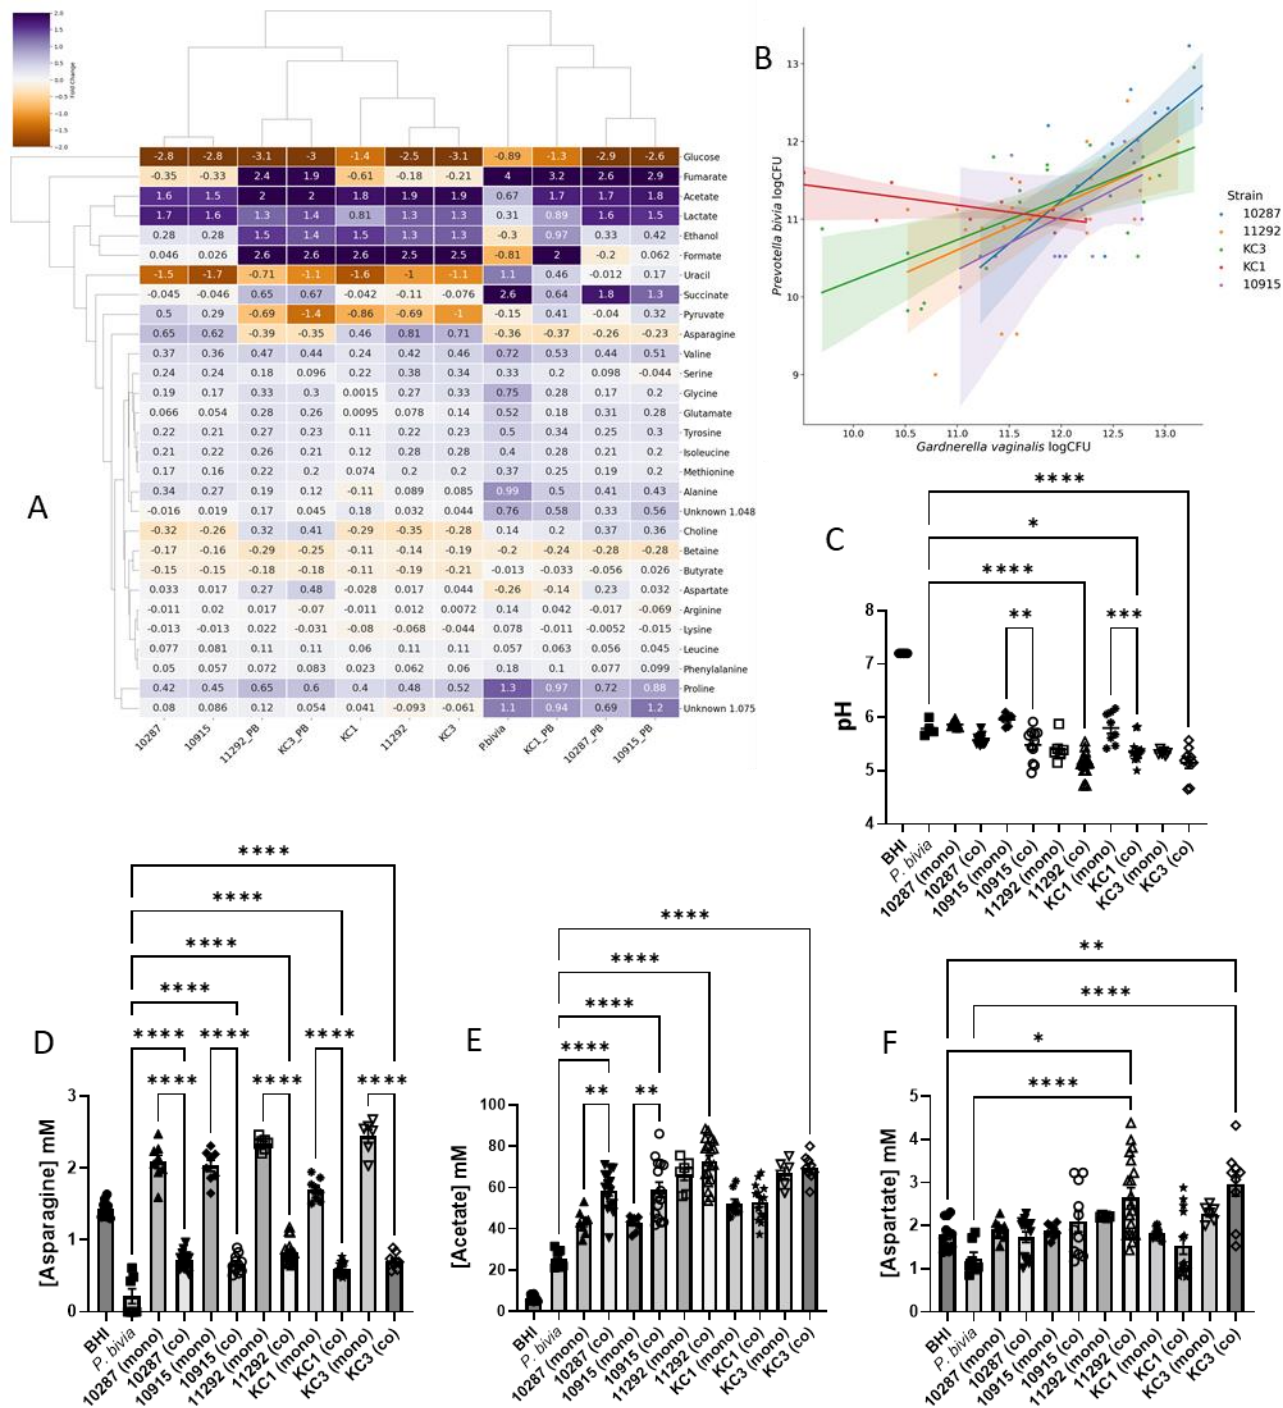

303

304 **Figure 4. Co-culture of *Prevotella bivia* NCTC 11156 and a panel of *Gardnerella vaginalis* isolates.**  
 305 relationship between metabolite fold-changes detected by  $^1\text{H}$  NMR of spent cultures (A). The correlation between CFU for *P.*  
 306 *bivia* and each *G. vaginalis* partner is shown for five co-cultures (B); Spearman and Pearson  $r$  are provided in Table 1. Spent  
 307 culture pH for mono- and co-cultures as well as fresh BHI (C). *G. vaginalis* supplies *P. bivia* with asparagine (D). Acetate levels  
 308 increase when bifid shunt *G. vaginalis* (10287 and 10915) are co-cultured with *P. bivia* (E). Symbiosis between *P. bivia* and  
 309 MAF *G. vaginalis* strains produces aspartate (F). Comparisons are shown between each co-culture and the corresponding  
 310 mono-cultures (C-E) and also fresh BHI (F) as determined by One-way ANOVA with Tukey correction for multiple comparisons.  
 311 Only  $p < 0.05$  shown; \*  $p < 0.05$ , \*\*  $p < 0.01$ , \*\*\*  $p < 0.001$ , \*\*\*\*  $p < 0.0001$ . Comparisons for further metabolites shown in  
 312 Fig. S7.

313 While supply of asparagine from *G. vaginalis* to *P. bivia* is observed for both MAF and BS strains, a further means  
314 by which BS strains, but not MAF strains, may supply *P. bivia* is also apparent. Unlike the BS *G. vaginalis* strains, *P.*  
315 *bivia* and all three MAF *G. vaginalis* strains consume pyruvate from BHI (Fig. S7C). With two species growing to-  
316 gether the metabolite data for co-culture has greater variance but considering just the data from monocultures  
317 (as above) indicates that some pyruvate is likely secreted from 10287 ( $p = 0.0035$ ) and 10915 ( $p = 0.0046$ ). As such  
318 the BS strains differ from the MAF strains in that they avoid competition with *P. bivia* for pyruvate and, likely, may  
319 supply it in co-culture.

320 As noted above, in monoculture the MAF strains 11292 and KC3 ( $p < 0.0001$ ) and KC1 ( $p < 0.05$ ) produce more  
321 acetate than the BS strains 10287 and 10915 but less lactate. In co-culture however acetate produced by *P.*  
322 *bivia*/10287 and *P. bivia*/10915 increases by 42-45% over that produced by *G. vaginalis* alone while the corre-  
323 sponding figure for the MAF strains is between 2 and 11%. Lactate production is largely unchanged in co-culture  
324 for any of the strains. Co-culture with *P. bivia* therefore has the potential to substantially increase overall acetate  
325 levels and change the acetate/lactate ratio when BS strains are present but not MAF strains. Further, while *P. bivia*  
326 was confirmed to consume formate, ethanol and aspartate by spiking experiments (Fig. S8) there is insufficient  
327 evidence here that production of these metabolites by MAF *G. vaginalis* provides substantial benefit for *P. bivia*  
328 with no apparent consumption of these metabolites in the respective co-cultures (Fig. S7G, H; Fig. 4F). Indeed,  
329 while both 11292 ( $p = 0.015$ ) and KC3 ( $p = 0.008$ ) produce aspartate in monoculture, the amount found in the  
330 spent co-culture media is increased respectively 2- and 3-fold (Fig. 4F). As previous work has indicated *P. bivia*  
331 supplies ammonia to *G. vaginalis*,<sup>25</sup> this suggests that MAF *G. vaginalis* might be performing a detoxification role  
332 by consuming both ammonia and fumarate (Fig. S7E), secreted by *P. bivia*, to produce aspartate.<sup>44</sup>

333 While the symbiotic relationship between *P. bivia* and *Pe. anaerobius* is commensal in BHI, we suggest here that  
334 the relationship between *P. bivia* and *G. vaginalis* is mutualistic since, as well as the presumed supply of ammonia  
335 and fumarate, we show *P. bivia* also likely supplies *G. vaginalis* with uracil (Fig. 5; S7J). As above, in monoculture  
336 *P. bivia* produces uracil and all five *G. vaginalis* strains consume it. Not all uracil is consumed however and in co-  
337 culture the overall levels remaining in spent culture are intermediate between that obtained from *P. bivia* mono-  
338 culture and available in fresh BHI. Nevertheless, pending further investigation, there is no reason to assume uracil  
339 liberated by *P. bivia* is not then available to *G. vaginalis*.

340 The levels of other metabolites vary little between the spent monoculture and co-cultures though choline, pro-  
341 duced by *P. bivia* but not *G. vaginalis* in monoculture, is further increased in three out of the five spent co-cultures  
342 10915, 11292, KC3; Fig S7N).

## 343 Discussion

344 The present study describes the metabolic strategies, and quantifies the relative metabolites produced and con-  
345 sumed, in BHI by both a panel of lactobacilli and a range of BV and/or PTB associated bacteria. Further, we char-  
346 acterise the effect, on metabolite consumption and excretion and consequently the likely vaginal chemical envi-  
347 ronment, of commensal symbiosis between *P. bivia* and *Pe. anaerobius* and a mutualistic symbiosis between *P.*  
348 *bivia* and *G. vaginalis*, providing mechanistic details for both. We demonstrate substantial differences in metabo-  
349 lite consumption/production between different strains of *G. vaginalis* that adopt either BS alone or MAF strategies  
350 and how this affects outcome of the mutualistic symbiosis with *P. bivia*. Below we consider the effects of the two  
351 symbiotic relationships before assessing how variation in metabolic strategy in lactobacilli, BV/PTB associated bac-  
352 teria and symbiosis affects the vaginal chemical environment and how this may have functional impact and modify  
353 metabolite-based approaches to PTB risk prediction.

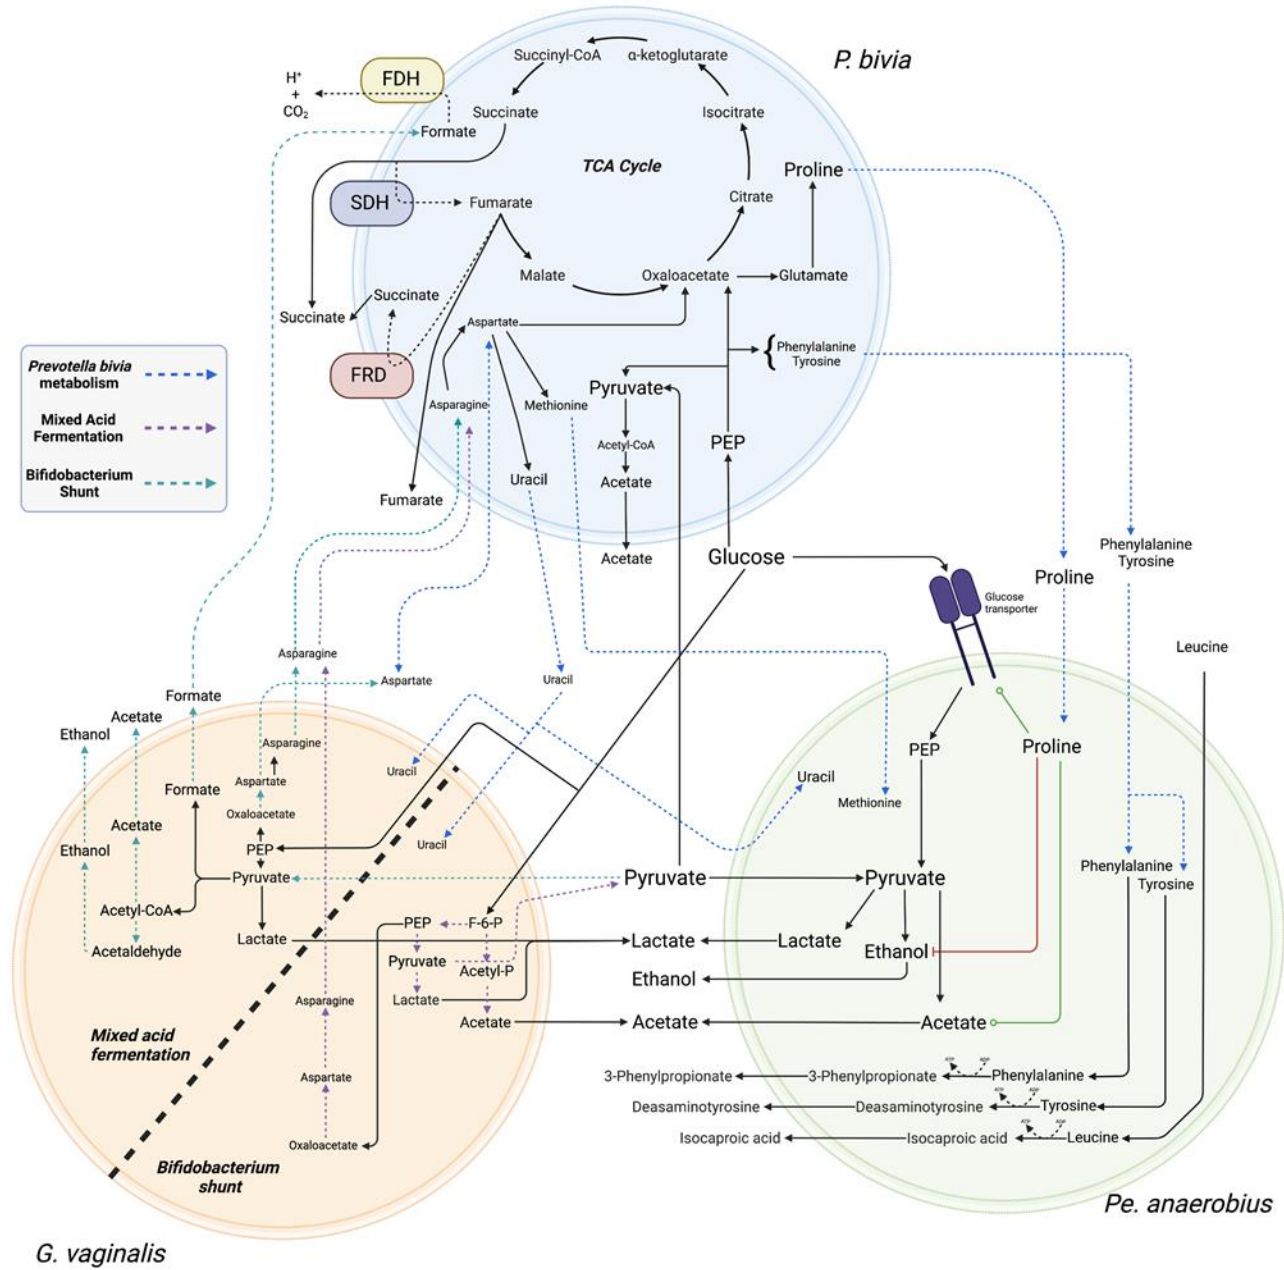

354

*G. vaginalis*

355

356 **Figure 5. Commensal relationship of *Prevotella bivia* NCTC 11156 with *Pe. anaerobius* NCTC 11460 and mutualistic relationships with BS and MAF *Gardnerella vaginalis*.** *P. bivia* supplies uracil, methionine, tyrosine, phenylalanine and proline to *Pe. anaerobius*. These all stimulate glucose uptake by *Pe. anaerobius* and increased proline availability also causes a switch from ethanol to acetate production, accounting for a 56% increase in acetate secretion. The relationship between *G. vaginalis* and *P. bivia* is mutualistic with the former supplying asparagine and the latter again supplying uracil. However, the relationship between MAF or BS *G. vaginalis* strains and *P. bivia* will differ with MAF strains competing with *P. bivia* for pyruvate but potentially supplying formate as an electron donor for anaerobic respiration. The origin of the increased aspartate found in MAF *G. vaginalis* and *P. bivia* co-culture is as yet unclear. FDH – formate dehydrogenase; SDH – succinate dehydrogenase; FRD – fumarate reductase. Image created with BioRender.com.

364

365 *Commensal supply of proline by P. bivia increases acetogenesis by Pe. anaerobius* – commensal symbiosis of *P. bivia* and *Pe. anaerobius* is known to depend on provision of amino acids from the former to the latter.<sup>24</sup> Here we show that, in addition, uracil supply is substantial and that these amino acids are limited to methionine, tyrosine, phenylalanine and proline with the last three consumed avidly by *Pe. anaerobius*. All four of these amino acids have been shown to stimulate glucose uptake, with leucine and tyrosine having the greatest effect.<sup>45</sup> The increased

368



369 availability of tyrosine and phenylalanine is associated with, respectably, a 23% increase in desaminotyrosine and  
370 a 33% increase in 3-phenylpropionate production in co-culture compared with *Pe. anaerobius* conditioned media.  
371 In contrast, proline availability increases by 470% in *P. bivia* conditioned media, and this leads to a 243% increase  
372 in 5-aminopentanoate production in co-culture. Proline has been shown to not only be capable of initiating glu-  
373 cose uptake, but also high proline levels are associated with a switch from ethanol to acetate production, a process  
374 which generates additional ATP.<sup>45</sup> Here, acetate in co-culture increases by 56% over the *Pe. anaerobius* monocul-  
375 ture while the corresponding increase for ethanol is only 17%. As such then, co-existence of *P. bivia* with *Pe. an-*  
376 *aerobius* and/or greater availability of proline from other sources can be expected to substantially increase pro-  
377 duction of acetate (Fig. 5).

378 *Diversity in G. vaginalis metabolism influences symbiosis with P. bivia.* When originally described, *G. vaginalis* was  
379 proposed to be the sole aetiological agent of BV since it was found in 127 out of 138 cases but in none of 78  
380 healthy women examined.<sup>27,46</sup> Since then more doubt has been expressed that *G. vaginalis* alone is the causative  
381 agent of BV as its distribution is more widespread and is frequently found colonising the vagina of healthy or non-  
382 symptomatic women. At the same time, there is recognition that there is considerable diversity in the *G. vaginalis*  
383 genus with both different species and clades or sub-groups being proposed.<sup>33,34,47</sup> The functional relevance of  
384 diversity in *G. vaginalis* has been highlighted by the finding in one study that an association, between *G. vaginalis*  
385 and PTB, was driven exclusively by sequence variants G2 with an association absent for other variants and the  
386 association for the genus lost when G2 variants were excluded.<sup>9</sup> The implication from this is that associations and  
387 mechanistic links between *G. vaginalis* and PTB, if they exist, will be obscured if diversity is not considered.

388 It has been shown recently that *G. vaginalis* enhances the invasive potential of *P. bivia*,<sup>26</sup> aiding its ascension into  
389 the uterus. A commensal metabolic symbiotic relationship between these two species was proposed over 20 years  
390 ago.<sup>25</sup> Here we use NMR metabolomics to characterise the symbiosis between *P. bivia* and *G. vaginalis*. Of the five  
391 *G. vaginalis* isolates tested here, those four that are identified as sequence variants G2,<sup>9</sup> benefit from a relation-  
392 ship that this is mutualistic rather than commensal and further show that the outcome is specific to the metabolic  
393 strategy of specific *G. vaginalis* isolates. As such we show that diversity in *G. vaginalis* metabolism is manifested  
394 both in monoculture and co-culture and has potential to alter the vaginal chemical environment. Lower lactate  
395 and higher acetate levels in the vagina are considered hallmarks of BV and are associated with sPTB.<sup>15,17,22</sup> Such  
396 conditions would be consistent with a depletion of lactobacilli and increase in *G. vaginalis*, but this relative differ-  
397 ence also describes the relationship between BS and MAF strains of *G. vaginalis* albeit not to the same magnitude.  
398 Further, since co-culture of MAF strains, but not BS strains, with *P. bivia* leads to an increase in aspartate produc-  
399 tion, this diversity impacts on an important metabolite predictor of sPTB.<sup>15</sup>

400 *Functional impact and implications for risk prediction of BV associated bacteria and lactobacilli metabolism.* Low  
401 vaginal pH and high lactate are both associated with protective benefits while short chain fatty acids (SCFAs) in-  
402 cluding acetate, butyrate and succinate (and propionate where present) have pleiotropic effects in inflamma-  
403 tion.<sup>18-21</sup> A recent comparison of the effects of treating cervicovaginal epithelial cells with mixtures of organic acids  
404 representing optimal (33 mM lactic acid/lactate, 4 mM acetic acid, 1 mM succinic, butyric and propionic acids)  
405 and non-optimal (6 mM lactate, 100 mM acetate, 20 mM succinate and 4 mM butyrate and propionate) vaginal  
406 microbiota, respectively at pH 3.9 and pH 7, revealed that the mixture chosen to mimic BV increased basal and  
407 toll-like receptor (TLR) induced production of pro-inflammatory cytokines including tumor necrosis factor- $\alpha$  (TNF-  
408  $\alpha$ ) but decreased basal production of CCL5 and IP-10 chemokines.<sup>20</sup> When tested alone, 100 mM acetate at pH 7  
409 largely recapitulated the effects of the BV mixture. Since the pKa of acetic acid is 4.75 and those of succinic acid  
410 are 4.2 and 5.6, these will exist respectively as the carboxylate or dicarboxylate anions at such an extreme as pH  
411 7. As both the relative concentrations and the ionization state of the organic acids are changing under these ex-  
412 perimental conditions, it is yet unclear as to the relative importance of these two factors and the impact of acetic

413 acid/acetate may depend also on the vaginal pH, driven by relative concentrations of, primarily lactic acid. The  
414 absolute and relative proportions of these two organic acids may therefore have substantial impact on the vaginal  
415 inflammatory state and need to be considered.

416 The description of metabolism, in pairings of *P. bivia* with diverse *G. vaginalis* isolates, reveals symbiosis has the  
417 potential to substantially increase the amount of acetate excreted by BS but not MAF strains. Similarly, co-culture  
418 between *P. bivia* and *Pe. anaerobius* modulates pH, eliminates net lactate production and increases acetate pro-  
419 duction. Together, these observations raise the prospect that co-existence of *P. bivia* with either of the two species  
420 might affect their physiological impact.

421 Further, while this study is predominantly focused on the metabolism of PTB and/or BV associated bacteria, it is  
422 also important to consider the metabolism of lactobacilli that often dominate the vaginal microbiome, and hence  
423 contribute to the metabolite background, and their known relationships with BV/PTB associated bacteria. Patterns  
424 of cooccurrence between *L. crispatus* and *G. vaginalis* have been shown to be highly exclusive.<sup>9</sup> In contrast, *L. iners*  
425 has been shown to co-exist with *G. vaginalis* at high frequency and its dominance has been found to be associated  
426 with preterm birth<sup>10</sup>. Since this work confirms *L. iners* is incapable of making acetate,<sup>41,42</sup> all acetate detected in  
427 an *L. iners* dominated sample will originate from other bacteria, frequently *G. vaginalis*, and the change in acetate  
428 levels may be expected to be larger in such situations than observed where other lactobacilli dominate or that are  
429 considered mixed dysbiotic. This may have implications both for inflammation and risk prediction. Indeed, acetate  
430 production by lesser producers (*A. vaginae*, *P. bivia* and perhaps BS *G. vaginalis*) may be easier to detect in low  
431 acetate background as found in *L. iners* dominated CST compared with other backgrounds, i.e. *L. crispatus* or  
432 where other lactobacilli co-exist e.g. *L. rhamnosus*, and the relative change will be greater. Similarly, although less  
433 abundant, succinate is produced by nine out of eleven lactobacilli strains tested here, with none detected for *L.*  
434 *iners* and *L. rhamnosus* 1. Again, detection of succinate produced by PTB and/or BV associated *P. bivia* and BV  
435 associated *M. curtisii* will be easier to detect in the *L. iners* CST background than in others.

436 A comparison between representative isolates of *L. iners* and *L. crispatus* dominated microbiomes is therefore  
437 warranted but beyond the scope of the present study. Notably, substantial variation in metabolism was observed  
438 in the two *L. crispatus* isolates, notably for asparagine consumption and aspartate and acetate production, and  
439 there is a need to establish the extent to which metabolism varies across a larger panel of isolates to appreciate  
440 its possible impact.

441 Finally, we assess whether the current study sheds any light on the protection against PTB suggested to be pro-  
442 vided by *L. acidophilus*.<sup>15</sup> Of note *L. acidophilus* does make the highest amount of lactate of all the lactobacilli  
443 isolates grown here in BHI ( $p < 0.0001$  for all but *L. rhamnosus*  $p < 0.05$  and *L. jensenii* 2  $p = 0.0047$ ) and it produces  
444 the spent culture with the lowest pH. Lactate production is correlated with H<sub>2</sub>O<sub>2</sub>, which would inhibit anaerobes,  
445 and bacteriocins lose activity and hydrogen peroxide becomes unstable as the pH increases. Peroxide is however  
446 only produced in presence of oxygen and *L. gasseri* may make more H<sub>2</sub>O<sub>2</sub> while cervicovaginal fluid has been  
447 shown to attenuate its microbicidal activity.<sup>48,49</sup> As such, the extent to which higher lactate production and greater  
448 ability to acidify the environment, from certain less-dominant lactobacilli, is protective against BV or PTB should  
449 be explored further, especially if able to co-exist within more diverse communities.

## 450 **Conclusion**

451 The diversity of intraspecies BV/PTB associated bacteria, and interspecies lactobacilli, metabolism as well as the  
452 commensal and mutualistic symbiotic relationships of *P. bivia* have the potential to alter pro-inflammatory ace-  
453 tate, and other metabolites in the vaginal metabolome and consequently alter risk of bacterial vaginosis and/or  
454 spontaneous preterm birth.

455 ASSOCIATED CONTENT

456 **Supporting Information.** Further comparison of metabolites produced by BV associated bacteria, lactobacilli and  
457 the effect of co-culture is provided as Supplementary Figures S1-S8.

458 **AUTHOR INFORMATION**

459 **Corresponding Author**

460 \* A. James Mason, King's College London, Institute of Pharmaceutical Science, Franklin-Wilkins Building 150 Stam-  
461 ford Street, London, SE1 9NH, UK; Tel: + 44 207 848 4813; Fax: + 44 207 848 4800; E-mail: james.mason@kcl.ac.uk

462 **Author Contributions**

463 VH, CKH, RMT, JMS and AJM designed the study. VH and AJM wrote the main manuscript text and prepared all  
464 figures. Assisted by JC, JH and GH, VH conducted all bacterial culture and NMR metabolomics experiments and,  
465 together with AJM, analysed the data. MEW carried out the analysis of whole genome sequence data. VA and CKH  
466 obtained isolates from swabs supplied by RMT. All authors approved the manuscript.

467 **Notes**

468 The authors declare no competing interests.

469 **Acknowledgment:** NMR experiments described in this paper were carried out using the facilities of the Centre for  
470 Biomolecular Spectroscopy, King's College London using instruments acquired with a Multi-user Equipment Grant  
471 from the Wellcome Trust and an Infrastructure Grant from the British Heart Foundation. We thank Dr Andrew  
472 Atkinson, Dr Adrien Le Guennec and Dr James Jarvis for assistance with liquid-state NMR experiments performed  
473 at KCL. VH was supported by a King's College London iCASE award, affiliated to the London Interdisciplinary Doc-  
474 toral Programme (LIDo), and Public Health England. Funding for the INSGHT cohort providing swabs was provided  
475 from Tommy's Charity (no. 1060508); NIHR Biomedical Research Centre (BRC) based at Guy's and St. Thomas'  
476 National Health Service Foundation Trust, and the Rosetrees Trust (charity no. 298582) (M303-CD1). The views  
477 expressed are those of the author(s) and not necessarily those of the NHS, the NIHR, or the Department of Health  
478 and Social Care. We thank Collette Allen at SDH for providing patient swabs.

479

## REFERENCES

480  
481  
482  
483  
484  
485  
486  
487  
488  
489  
490  
491  
492  
493  
494  
495  
496  
497  
498  
499  
500  
501  
502  
503  
504  
505  
506  
507  
508  
509  
510  
511  
512  
513  
514  
515  
516  
517  
518  
519  
520  
521  
522  
523  
524  
525  
526  
527  
528  
529  
530  
531  
532  
533  
534  
535

1. Onderdonk, A.B., Delaney, M.L. & Fichorova, R.N. The human microbiome during bacterial vaginosis. *Clin. Microbiol. Rev.* **29**, 223-238 (2016).
2. Guaschino S, et al. Aetiology of preterm labour: bacterial vaginosis. *BJOG*. **113** (suppl 3), 46–51 (2006).
3. Leitich, H. & Kiss, H. Asymptomatic bacterial vaginosis and intermediate flora as risk factors for adverse pregnancy outcome. *Best Pract. Res. Clin. Obstet. Gynaecol.* **21**, 375-390 (2007).
4. US Preventive Services Task Force. Screening for Bacterial Vaginosis in pregnant persons to prevent preterm delivery. *JAMA* **323**, 1286-1292 (2020).
5. Ravel, J., et al. Vaginal microbiome of reproductive-age women. *Proc. Natl. Acad. Sci. USA*. **108** (Supplement\_1), 4680–4687 (2011).
6. Romero, R., et al. The vaginal microbiota of pregnant women who subsequently have spontaneous preterm labor and delivery and those with a normal delivery at term. *Microbiome*. **2**, 18 (2014).
7. DiGiulio, D.B., et al. Temporal and spatial variation of the human microbiota during pregnancy. *Proc. Natl. Acad. Sci. USA* **112**, 11060–11065 (2015).
8. MacIntyre, D.A., et al. The vaginal microbiome during pregnancy and the postpartum period in a European population. *Sci. Rep.* **5**, 1–9 (2015).
9. Callahan, B.J., et al. Replication and refinement of a vaginal microbial signature of preterm birth in two racially distinct cohorts of US women. *Proc. Natl. Acad. Sci. USA*. **114**, 9966–9971 (2017).
10. Kindinger, L.M., et al. The interaction between vaginal microbiota, cervical length, and vaginal progesterone treatment for preterm birth risk. *Microbiome*. **5**, 6 (2017).
11. Stafford, G.P., et al. Spontaneous preterm birth is associated with differential expression of vaginal metabolites by lactobacilli dominated microflora. *Front Physiol.* **8**, 615 (2017).
12. Elovitz, M.A., et al. Cervicovaginal microbiota and local immune response modulate the risk of spontaneous preterm delivery. *Nat. Commun.* **10**, 1305 (2019).
13. Fettweis, J.M., et al. The vaginal microbiome and preterm birth. *Nat. Med.* **25**, 1012–1021 (2019).
14. Serrano, M.G., et al. Racioethnic diversity in the dynamics of the vaginal microbiome during pregnancy. *Nat Med.* **25**, 1001–1011 (2019).
15. Flaviani, F. et al. Cervicovaginal microbiota and metabolome predict preterm birth risk in an ethnically diverse cohort. *JCI Insight* **6**, e149257 (2021).
16. Pace, R.M., Chu, D.M., Prince, A.L., Ma, J., Seferovic, M.D. & Aagaard, K.M. Complex species and strain ecology of the vaginal microbiome from pregnancy to postpartum and association with preterm birth. *Med* **2**, 1027-1049 (2021).
17. Amabebe, E., Reynolds, S., Stern, V., Stafford, G., Paley, M. & Anumba, D.O.C. Cervicovaginal fluid acetate: a metabolite marker of preterm birth in symptomatic pregnant women. *Front. Med.* **3**, 48 (2016).
18. Aldunate, M., Srbinovski, D., Hearps, A.C., Latham, C.F., Ramsland, P.A., Gugasyan, R., Cone, R.A. & Tachedjian, G. (2015) Antimicrobial and immune modulatory effects of lactic acid and short chain fatty acids produced by vaginal microbiota associated with eubiosis and bacterial vaginosis. *Front. Physiol.* **6**, 164 (2015)
19. Mirmonsef, P., Zariffard, M.R., Gilbert, D., Makinde, H., Landay, A.L. & Spear, G.T. Short-chain fatty acids induce pro-inflammatory cytokine production alone and in combination with Toll-like receptor ligands. *Am. J. Reprod. Immunol.* **67**, 391–400 (2012).
20. Li, M., van Esch, B.C.A.M., Wagenaar, G.T.M., Garssen, J., Folkerts, G. & Henricks, P.A.J. Pro- and anti-inflammatory effects of short chain fatty acids on immune and endothelial cells. *E. J. Pharmacol.* **831**, 52-59 (2018).
21. Delgado-Diaz, D.J., Tyssen, D., Hayward, J.A., Gugasyan, R., Hearps, A.C., Tachedjian, G. Distinct immune responses elicited from cervicovaginal epithelial cells by lactic acid and short chain fatty acids associated with optimal and non-optimal vaginal microbiota. *Front. Cell. Infect. Microbiol.* **9**, 446 (2020).
22. Yeoman, C.J., Thomas, S.M., Miller, M.E., Ulanov, A.V., Torralba, M., Lucas, S., et al.. A multi-omic systems-based approach reveals metabolic markers of bacterial vaginosis and insight into the disease. *PLoS ONE* **8**, e56111 (2013).
23. Spiegel, C.A., Amsel, R., Eschenbach, D., Schoenkecht, F. & Holmes, K.K. Anaerobic bacteria in nonspecific vaginitis. *N. Engl. J. Med.* **303**, 601–607 (1980).
24. Pybus, V. & Onderdonk, A.B. A commensal symbiosis between *Prevotella bivia* and *Peptostreptococcus anaerobius* involves amino acids: potential significance to the pathogenesis of bacterial vaginosis. *FEMS Immun. Med. Microbiol.* **22**, 317-327 (1998).
25. Pybus, V & Onderdonk, A.B. Evidence for a commensal, symbiotic relationship between *Gardnerella vaginalis* and *Prevotella bivia* involving ammonia: potential significance for bacterial vaginosis. *J. Infect. Dis.* **175**, 406-413 (1997).
26. Gilbert, N.M., Lewis, W.G., Li, G., Sojka, D.K., Lubin, J.B. & Lewis, A.L. *Gardnerella vaginalis* and *Prevotella bivia* trigger distinct and overlapping phenotypes in a mouse model of bacterial vaginosis. *J. Infect. Dis.* **220**, 1099-1108 (2019).
27. Morrill, S., Gilbert, N.M. & Lewis, A.L. *Gardnerella vaginalis* as a cause of bacterial vaginosis: appraisal of the evidence from *in vivo* models. *Front. Cell. Infect. Microbiol.* **10**, 168 (2020).
28. Schmidt, T.S.B., Rodrigues, J.F.M. & von Mehring, C. Ecological consistency of SSU rRNA-based Operational Taxonomic Units at a global scale. *PLoS Comput. Biol.* **10**, e1003594 (2014).
29. Ulrich, E. L., Akutsu, H., Doreleijers, J. F., Harano, Y., Ioannidis, Y. E., Lin, J., Livny, M., Mading, S., Maziuk, D., Miller, Z., Nakatani, E., Schulte, C. F., Tolmie, D. E., Kent Wenger, R., Yao, H. & Markley, J. L. BioMagResBank. *Nucleic Acids Res.* **36**, D402–D408 (2007).



- 536  
537  
538  
539  
540  
541  
542  
543  
544  
545  
546  
547  
548  
549  
550  
551  
552  
553  
554  
555  
556  
557  
558  
559  
560  
561  
562  
563  
564  
565  
566  
567  
568  
569  
570  
571  
572  
573  
574
30. Dieterle, F., Ross, A., Schlotterbeck, G. & Senn, H. Probabilistic quotient normalization as robust method to account for dilution of complex biological mixtures. Application in <sup>1</sup>H NMR metabonomics. *Anal. Chem.* **78**, 4281–4290 (2006).
  31. Bolger, A.M., Lohse, M. & Usadel, B. Trimmomatic: a flexible trimmer for Illumina sequence data. *Bioinformatics* **30**, 2114–2120 (2014).
  32. Bankevich, A. *et al.* SPAdes: a new genome assembly algorithm and its applications to single-cell sequencing. *J. Comput. Biol.* **19**, 455–477 (2012).
  33. Ahmed, A. *et al.* Comparative Genomic Analyses of 17 Clinical isolates of *Gardnerella vaginalis* provide evidence of multiple genetically isolated clades consistent with subspeciation into genovars. *J. Bacteriol.* **194**, 3922–3937 (2012).
  34. Schellenberg, J.J., Jayaprakash, T.P., Gamage, N.W., Patterson, M.H., Vaneechoutte, M. & Hill, J.E. *Gardnerella vaginalis* subgroups defined by cpn60 sequencing and sialidase activity in isolates from Canada, Belgium and Kenya. *PLoS ONE* **11**, e0146510 (2016).
  35. Garcia, E.M., Serrano, M.G., Edupuganti, L. Edwards, D.J., Buck, G.A. & Jefferson, K.K. Sequence comparison of vaginolysin from different *Gardnerella* species. *Pathogens* **10**, 86 (2021).
  36. Gavini, F., Van Esbroeck, M., Touzel, J.P., Fourment, A. & Goossens, H. Detection of fructose-6-phosphate phosphoketolase (F6PPK), a key enzyme of the Bifid-Shunt, in *Gardnerella vaginalis*. *Anaerobe* **2**, 191–193 (1996).
  37. Cruden, D.L. & Galask, R.P. Reduction of trimethylamine oxide to trimethylamine by *Mobiluncus* strains isolated from patients with bacterial vaginosis. *Microbial Ecol. Health Dis.* **1**, 95–100 (1988).
  38. Spiegel, C.A. & Roberts, M. *Mobiluncus* gen. nov. *Mobiluncus curtisii* subsp. *curtisii* sp. nov. *Mobiluncus curtisii* subsp. *holmesii* subsp. nov., and *Mobiluncus mulieris* sp. nov., curved rods from the human vagina. *Int. J. Systematic Bacteriol.* **34**, 177–184 (1984).
  39. Holdeman, L.V. & Johnson, J.L. *Bacteroides disiens* sp. Nov. and *Bacteroides bivius* sp. Nov. from human clinical infections. *Int. J. Systematic Bacteriol.* **27**, 337–345 (1977).
  40. Ruzal, S.M. (Ed.) *Lactobacillus Genomics and Metabolic Engineering*. Caister Academic Press, 9781910190890 (2019).
  41. Macklaim, J.M., Gloor, G.B., Anukam, K.C., Cribby, S. & Reid, G. At the crossroads of vaginal health and disease, the genome sequence of *Lactobacillus iners* AB-1. *Proc. Natl. Acad. Sci. USA* **108**, 4688–4695 (2011).
  42. France, M.T., Mendes-Soares, H. & Forney, L.J. Genomic comparisons of *Lactobacillus crispatus* and *Lactobacillus iners* reveal potential ecological drivers of community composition in the vagina. *App. Environ. Microbiol.* **82**, 7063–7073 (2016).
  43. Turgeon, D.K., Bartley, S.L. & Dowell, V.R. Use of modified norleucine-tyrosine broth in identification of *Peptostreptococcus anaerobius*. *J. Clin. Microbiol.* **28**, 2120–2121 (1990).
  44. Schleicher, L., Herdan, S., Fritz, G., Trautmann, A., Seifert, J. & Steuber, J. Central carbon metabolism, sodium-motive electron transfer, and ammonium formation by the vaginal pathogen *Prevotella bivia*. *Int. J. Mol. Sci.* **22**, 11925 (2021).
  45. Curtis, M.A., Wittenberger, C.L. & Thompson, J. Proline requirement of glucose utilisation by *Peptostreptococcus anaerobius* ATCC 27337. *Infect. Immun.* **55**, 352–357 (1987).
  46. Gardner, J.L. & Dukes, C.D. *Haemophilus vaginalis* vaginitis: a newly defined specific infection previously classified non-specific vaginitis. *Am. J. Obstetr. Gynecol.* **69**, 962–976 (1955).
  47. Vaneechoutte, M., Guschin, A., Van Simaey, L., Gansemans, Y., Van Nieuwerburgh, F., Cools, P. Emended description of *Gardnerella vaginalis* and description of *Gardnerella leopoldii* sp. nov., *Gardnerella piovii* sp. nov. and *Gardnerella swidsinskii* sp. nov., with delineation of 13 genomic species within the genus *Gardnerella*. *Int. J. Syst. Evol. Microbiol.* **69**, 679–687 (2019).
  48. Strus, M., Brzychczy-Włoch, M., Gosiewski, T., Kochan, P. & Heczko, P.B. The *in vitro* effect of hydrogen peroxide on vaginal microbial communities. *FEMS Immunol. Med. Microbiol.* **48**, 56–63 (2006).
  49. O'Hanlon, D.E., Lanier, B.R., Moench, T.R. & Cone, R.A. Cervicovaginal fluid and semen block the microbicidal activity of hydrogen peroxide produced by vaginal lactobacilli *BMC Infect. Dis.* **10**, 120 (2010).

575 **Tables**

576 **Table 1. *G. vaginalis* strain characteristics.** All strains are positive for the genes encoding sialidase and vaginolysin. Concord-  
 577 ant MICs are reported from three independently repeated experiments. ng = no growth.

| Strain     | Clade <sup>34</sup> /Sub-<br>group <sup>35</sup> /Sequence<br>variant <sup>9</sup> | Genome<br>size (kb) | GC content<br>(%) | MIC (µg/ml) |                   |                    |            |
|------------|------------------------------------------------------------------------------------|---------------------|-------------------|-------------|-------------------|--------------------|------------|
|            |                                                                                    |                     |                   | Clindamycin | Erythromy-<br>cin | Metronida-<br>zole | Tinidazole |
| NCTC 10287 | 1/C/G2                                                                             | 1663                | 41.3              | 0.015625    | 0.015625          | 4                  | 2-4        |
| NCTC 10915 | 1/C/G2                                                                             | 1665                | 41.2              | 0.03125     | 0.015625          | 4                  | 2          |
| NCTC 11292 | 1/C/G2                                                                             | 1659                | 41.3              | 0.03125     | 0.015625          | 4                  | 2-4        |
| KC1        | 3/D/G1                                                                             | 1542                | 43.3              | 0.015625    | 0.015625          | >256               | 128        |
| KC2        | 1/C/G2                                                                             | 1657                | 41.3              | 0.0625      | 0.015625          | 2                  | 1-8        |
| KC3        | 1/C/G2                                                                             | 1733                | 41.1              | 0.0625      | 0.03125           | 16                 | 64-128     |
| KC4        | 1/C/G2                                                                             | 1660                | 41.3              | ng          | 0.0078125         | 4                  | ng         |

578

579 **Table 2. *P. bivia* vs *G. vaginalis* co-culture correlation.** Relationship between CFU counts for each species as a function of *G.*  
580 *vaginalis* isolate as determined by parametric Pearson or non-parametric Spearman correlation coefficients. Only for KC1 is a  
581 negative correlation between the two species found while positive correlations exist for the remaining four isolates.

| <i>G. vaginalis</i> strain | Number of XY pairs | Spearman |                | Pearson |                |
|----------------------------|--------------------|----------|----------------|---------|----------------|
|                            |                    | r        | P (two-tailed) | r       | P (two-tailed) |
| NCTC 10287                 | 16                 | 0.7917   | 0.0005         | 0.7781  | 0.0004         |
| NCTC 10915                 | 9                  | 0.6442   | 0.0694         | 0.5419  | 0.1318         |
| NCTC 11292                 | 22                 | 0.5457   | 0.0086         | 0.5133  | 0.0146         |
| KC1                        | 10                 | -0.4768  | 0.1645         | -0.6896 | 0.0274         |
| KC3                        | 19                 | 0.5947   | 0.0072         | 0.6392  | 0.0032         |

582
